# Supplementary material
Source: Springer Nature journal article supplement (https://www.springermedizin.de/resource/supplementary/12970_2007_58_MOESM2_ESM.pdf/9594268)

# Number of hits (correct flight, draw and fade)

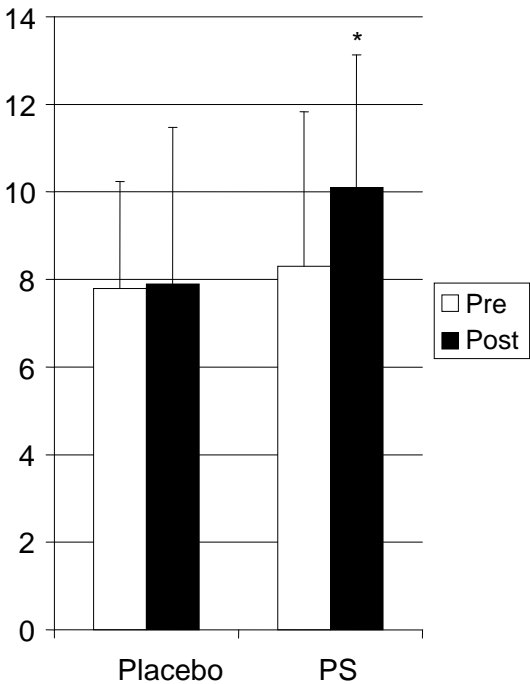

Supplement: MOESM2 [file 9594268]
